# InteBac - An integrated bacterial and baculovirus expression vector suite

Veronika Altmannova<sup>1</sup>, Andreas Blaha<sup>1,2</sup>, Susanne Astrinidis<sup>1</sup>, Heidi Reichle<sup>1</sup>, and John R. Weir<sup>1</sup>✉

<sup>1</sup>Friedrich Miescher Laboratory of the Max-Planck-Society, Max-Planck-Ring 9, 72076 Tübingen, Germany

<sup>2</sup>Present address: Research Institute of Molecular Pathology (IMP), Campus-Vienna-Biocenter 1, A-1030 Vienna, Austria

**The successful production of recombinant protein for biochemical, biophysical and structural biological studies critically depends on the correct expression organism. Currently the most commonly used expression organisms for structural studies are *E. coli* (ca. 70% of all PDB structures) and the baculovirus/insect cell expression system (ca. 5% of all PDB structures). While insect cell expression is frequently successful for large eukaryotic proteins, it is relatively expensive and time consuming compared to *E. coli* expression. Frequently the decision to carry out a baculovirus project means restarting cloning from scratch. Here we describe an integrated system that allows the simultaneous cloning into *E. coli* and baculovirus expression vectors using the same PCR products. The system offers a flexible array of N- and C- terminal affinity, solubilisation and utility tags, and the speed allows expression screening to be completed in *E. coli*, before carrying out time and cost intensive experiments in baculovirus. Finally, we describe a means of rapidly generating polycistronic bacterial constructs based on the hugely successful biGBac system.**

recombinant protein | structural biology | biochemistry | insect cell  
Correspondence: [john.weir@tuebingen.mpg.de](mailto:john.weir@tuebingen.mpg.de)

## Introduction

Obtaining recombinant protein of interest can be a challenging multi-parametric problem. The parameters to consider include codon usage, vector, fusion tag, expression organism, expression conditions and purification strategy<sup>1</sup>. Previous work has described the use of universal vectors compatible with *E. coli*, baculovirus and mammalian expression systems for example the pOPIN system<sup>2</sup>. However for insect cell expression the excellent MultiBac system<sup>3</sup> has set the standard. A recent baculovirus expression method has combined MultiBac with Gibson assembly<sup>4</sup> to yield the biGBac system<sup>5,6</sup>. Using biGBac one can assemble a five open reading frame polycistronic vector in a single step, and combine five of these in a second step to assemble up to 25 ORFs in a single vector. Our overwhelming satisfaction with biGBac lead us to further develop the system while creating a parallel, compatible, system for *E. coli*.

We have previously used the pST44 polycistronic expression system for bacterial expression<sup>7</sup>. Not only does pST44 provide a rapid means of generating multicistronic constructs, but the pST44 family pTRC50 vectors are excellent expression vectors in their own right. However, the pST44 method uses restriction enzyme based approaches which has been superseded by ligation independent approaches,

particularly Gibson assembly, in the last 10 years<sup>4</sup>.

Until recently in our lab, one would make a decision to pursue either a *E. coli* approach or an insect cell approach to obtaining a recombinant protein of interest. Working in parallel was of course always possible, but would require creating different PCR products, preparing different vectors, and being limited by the fusion proteins available for each system. To address this limitation we set out to create a unified and integrated *E. coli* insect cell expression system. Our goal was to be able to take a single PCR product and clone this into numerous *E. coli* and insect cell expression vectors. One would process both sets of vectors in parallel, and have the result for *E. coli* expression before one even transfected insect cells. The ultimate result being that one has more time and resources to explore the parametric space of recombinant protein expression (summarized in Figure 1).

When pursuing the expression of multi-subunit complexes, the creation of a polycistronic construct, for either insect cell or bacterial expression, is a useful means of both ensuring appropriate complex stoichiometry but also reducing the complexity of a biochemical reconstitution. However, the establishment of the appropriate conditions by screening subunits and fusion tags is easier when combining multiple monocistronic constructs in co-expression experiments. In insect cells, this is easily achieved by co-infecting with multiple different viruses. In *E. coli*, the situation is complicated by both antibiotic and origin of replication usage and subsequent plasmid incompatibility. To this end, we modified our *E. coli* vector set with origins of replication and antibiotic resistances compatible with co-expression.

Although biGBac and Multibac are powerful polycistronic expression systems for the baculovirus, one has intrinsically greater flexibility through co-infection with different unicistronic viruses. In our laboratory we often use this as an approach to identify appropriate constructs for a multisubunit complex before moving onto polycistronic assembly. Here we describe the implementation of a parallel system for the rapid screening of *E. coli* co-expression vectors that are compatible with simultaneous cloning into insect cell expression vectors. Furthermore we describe a Gibson assembly based approach for the rapid generation of polycistronic *E. coli* expression constructs. This system has greatly improved the workflow in our lab, and we hope other labs will benefit from our efforts.

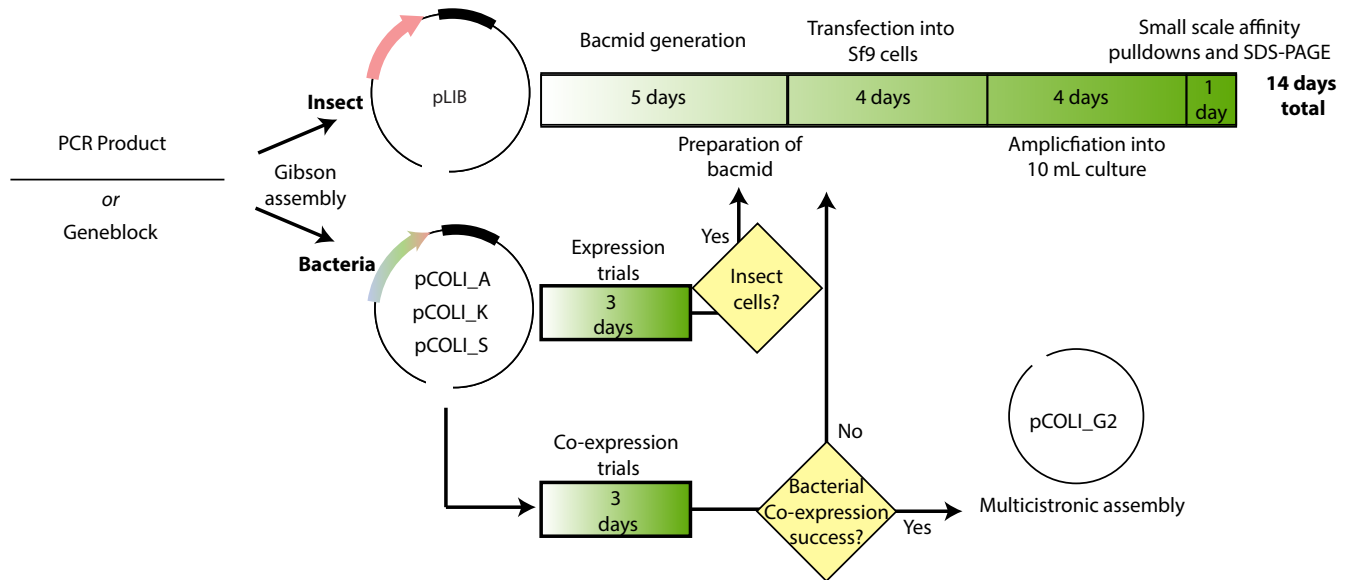

**Fig. 1.** Workflow within the InteBac and biGBac systems. Using a single PCR product one clones simultaneously into pLIB (for insect cells) and pCOLI (for bacteria). Depending upon the results of the *E. coli* expression trial, one can decide whether or not to proceed with insect cell work.

## Results

**Generation of N- and C- terminal fusion vectors.** We started with creating an insect cell expression vector based on the pLIB vector<sup>5,6</sup> with a variety of N-terminal fusion proteins. We divided the tags into different categories; affinity, solubilisation, and utility (see Table 1). In order to have universal overhangs for both the insect cells and bacterial expression systems, these were designed to correspond to a rhinovirus-3C site between the fusion protein and the protein of interest (see Table 2 for all primer overhangs). We chose 3C cleavage site over the more frequently used

| Fusion name | Description                         | Type                     | Mw N-term fusion |
|-------------|-------------------------------------|--------------------------|------------------|
| 6xHis       | IMAC purification                   | Affinity                 | 3 kDa            |
| 12xHis      | IMAC from insect cells              |                          | 3.8 kDa          |
| STREP       | Twin Strep-II tag                   |                          | 4.9 kDa          |
| CBP         | Calmodulin binding peptide          |                          | 4.3 kDa          |
| GST         | Glutathione-S-transferase           | Solubilisation /Affinity | 26.7 kDa         |
| MBP         | 6x His plus Maltose binding protein |                          | 42.7 kD          |
| SUMO        | 6 x His plus SUMO                   |                          | 13.5 kDa         |
| Trx         | 6 x His plus Thioredoxin            | Solubilisation           | 14 kDa           |
| SNAP        | 6 x His plus SNAP tag               | Utility                  | 20 kDa           |
| HA          | 6 x His plus 3 x HA                 | Identification           | 6.3 kDa          |
| Myc         | 6 x His plus 6 x Myc                |                          | 11 kDa           |

**Table 1.** Summary of fusion proteins used in the InteBac system

TEV site, due to the 3C protease's higher catalytic activity at lower temperatures<sup>8</sup>. Next we created a more limited set of C-terminal fusion proteins, placing a serine-glycine linker between the protein of interest and the C-terminal fusion protein. This linker ensured that the C-terminal overhang would be universal for all C-terminal fusions. We transferred these fusion protein ORFs from the pLIB backbone into the pTRC50 backbone (Ampr / pBR232 origin<sup>7</sup>), for bacterial expression (from now on referred to as pCOLI\_A). Finally, in order to give us the greatest flexibility in *E. coli*, we transferred all the expression cassettes into two additional backbones pCOLI-S (Strept/RSF1030 origin<sup>9</sup>) and pCOLI\_K (Kanr / CloDF13 origin<sup>10</sup>). This combination of resistances and origins of replication gives the user the ability to co-express three proteins simultaneously (see Supplementary Table 1 for exhaustive list of all expression vectors).

**Untagged vectors.** Many proteins are not amenable to N- or C- terminal tagging, but can be purified through the affinity tag on a binding partner. In order to facilitate co-expression of several proteins we required untagged vectors. Despite our efforts we were unable to generate a generic N-terminal overhang that would work for both untagged *E. coli* and insect cell vectors. As such, there is a generic overhang for untagged insect cell and untagged *E. coli* vectors, rather a specific forward primer for each (pLIB\_fwd and COLI\_fwd respectively, see Table 2). To facilitate co-expression in *E. coli* we also created untagged pCOLI\_S and pCOLI\_K vectors. These vectors contain compatible origins of replication and resistances to facilitate co-transformation into bacteria.

**Multicistronic vectors.** Our pLIB derived vectors remain fully compatible with the pBIG multicistronic vectors from the biGBac system<sup>5,6</sup>. To create a multicistronic bacterial

| Primer Name | Sequence (5' ->3')                         | Description                                               |
|-------------|--------------------------------------------|-----------------------------------------------------------|
| Tag_Fwd     | CTGTTCCAGGGGCCCGGATCC[ORF]                 | For cloning into all N-terminal fusion expression vectors |
| Rev         | TCCTCTAGTACTTCTCGACAAGCTTTTA[rev_comp_ORF] | For cloning into all vectors with no C-terminal fusion    |
| LIB_Fwd     | CCACCATCGGGCGCGGATCC[ORF]                  | Cloning into pLIB vectors with no N-terminal fusion       |
| Tag_Rev     | TCCAGATCCAGATCCGCTTCCACT[rev_comp_ORF]     | Cloning into all vectors with C-terminal fusion protein   |
| COLI_Fwd    | TTTGTTAACTTTAAGAAGGAGACTGGATC[ORF]         | Cloning into all pCOLI vectors with no N-term fusion      |

**Table 2.** Primers used to clone the gene of interest into the pLIB and pCOLI vectors as untagged or C- or N-terminal fusion constructs.

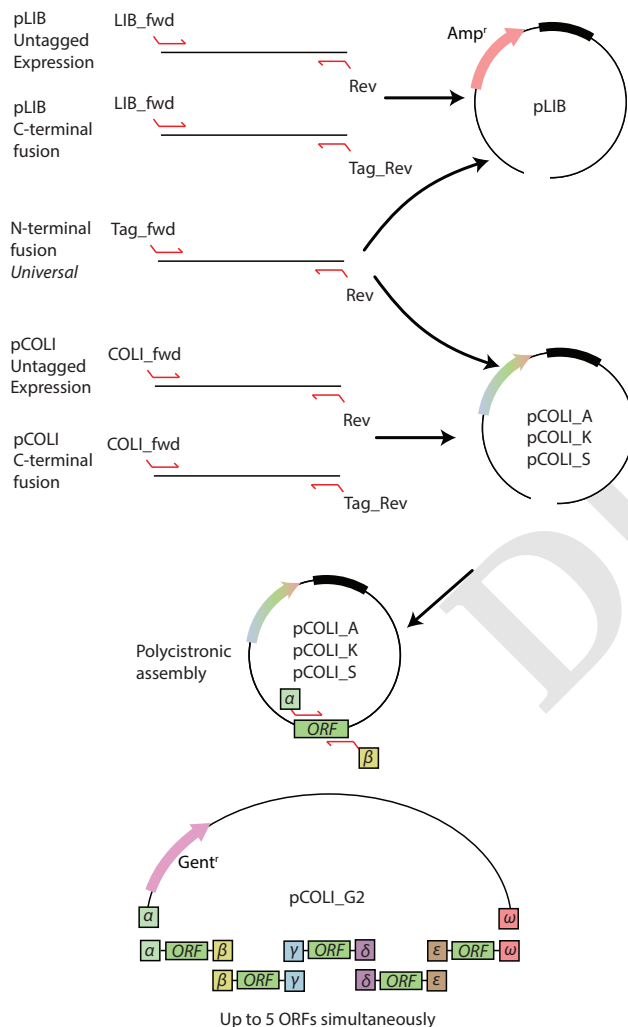

**Fig. 2.** Cloning in the InteBac system. Primers, or overhangs on geneblocks, are chosen to match the vector. The N-terminal fusion vectors are truly universal, allowing for cloning into either the pLIB or the pCOLI backbones. From the pCOLI backbones one can generate a polycistronic construct with up to five insertions. Fewer insertions can be used, but the alpha and omega overhangs must be present.

vector we took the pST44 vector backbone and added a gentamycin cassette (from now on referred to pCOLI\_G2). We designed a set of PCR primers for amplifying the entire ORF from the pCOLI family of vectors (including the RBS, but not the promoter or terminator). The Gibson overhangs described in the biGbac system were thoroughly tested, both *in silico* and *in vitro*, to give the greatest assembly efficiency. As such we use the same principle, and indeed the same overhang sequences as in biGbac, to create a multicistronic pST44 vector, in addition to the use of the SmaI enzyme.

**Proof of concept - RPA complex.** Our interest in homologous recombination has led us to look at several protein complexes involved, one of which is RPA (Replication Protein A, reviewed in 11&12), a heterotrimer consisting of Rfa1, Rfa2 and Rfa3 in budding yeast<sup>13</sup>. Expression and purification of yeast RPA in *E. coli* has been previously described<sup>14</sup>. We cloned Rfa1, Rfa2 and Rfa3 into Strep-pCOLI-A, His-pCOLI-S and His-pCOLI-K respectively. We initially demonstrated that the complex could be expressed and partially purified through a co-expression of all three proteins in *E. coli* C41(DE3), and purification via the twin Strep-II tag, followed by confirmation of protein identity via western blotting (Figure 3, lanes 1-4). We amplified the expression cassettes for each of the three RPA subunits, and Gibson assembled into the linearised pCOLI-2G backbone. Gentamycin resistant transformants were confirmed by sequencing, and subsequently transformed into the BL21 cells. Our Gibson assembly of polycistronic RPA was just as successful, if not more so, than the co-expression of all three RPA subunits. Furthermore there is the advantage of carrying out transformations with a single plasmid, using a single selection antibiotic, and the possibility of carrying out further co-expressions with pCOLI-K and pCOLI-S (Figure 3).

## Conclusions

The implementation of our InteBac system has greatly streamlined the work processes in our laboratory. It has allowed us to explore additional experimental space in terms of finding suitable expression conditions for our protein of interest. Our system is also well suited to the use of "oven-ready" synthetic dsDNA (Geneblocks), allowing the incorporation of the Tag<sub>fwd</sub> and Rev overhangs into the synthetic DNA,

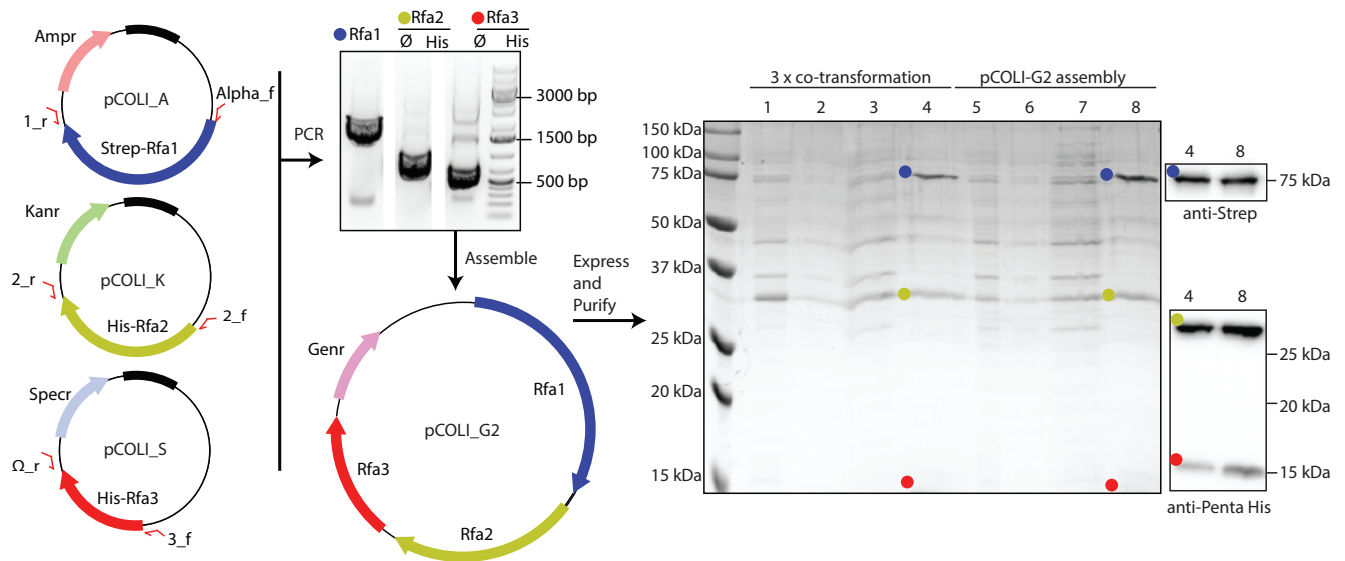

**Fig. 3.** Cloning and expression of the trimeric RPA complex from yeast. Each RPA subunit was cloned into a different pCOLI backbone, which were then used for co-expression. Additionally we generated a multicistronic assembly of RPA into the pCOLI\_G2 backbone. We compared the expression of the co-transformation versus pCOLI\_G2. SDS-PAGE was run of crude lysate (lanes 1 and 5), clear lysate (lanes 2 and 6), flow through from the resin (lanes 3 and 7), elution from the beads (4 and 8)

prior to assembly into the pLIB or pCOLI vectors.

## Materials and Methods

**Vector construction.** All cloning and plasmid manipulation steps were first carried out *in silico* using the SnapGene software (GSL BioTech LLC). The pTRC50 and pLIB vectors were gifts from Song Tan (Penn State) and Jan Michael Peters (IMP Vienna), respectively. PCR amplifications were carried out using 2 x Q5 Master Mix (NEB), with cycling times and temperatures according to the manufacturer's instructions. The Kanamycin and Streptomycin resistance/origin of replication modules were synthetic dsDNA constructs (IDT). The gentamycin cassette was amplified from the pBIG2 vectors. Since the gentamycin cassette also contains one restriction site for BglII, we introduced a silent mutation into its sequence. All affinity tags insertions and plasmid manipulation was carried out using a combination of synthetic dsDNA (IDT) and Gibson assembly. Successful assemblies were verified by Sanger sequencing.

**Gibson Master Mix.** For all Gibson assemblies we used our own master mix. Briefly, a 5 x isothermal reaction buffer was prepared (25% PEG-8000, 500 mM Tris-HCl pH 7.5, 50 mM MgCl<sub>2</sub>, 50 mM DTT, 1 mM each of the 4 dNTPs, and 5 mM NAD) and pre-aliquoted. To prepare Gibson master mix we combined 320 μl 5X ISO buffer with 0.64 μl of 10 U/μl T5 exonuclease, 20 μl of 2 U/μl Phusion polymerase and 160 μl of 40 U/μl Taq ligase (all enzymes from NEB). ddH<sub>2</sub>O was then added to a final volume of 1.2 ml.

**Linear Vector Preparation.** All vectors (with the exception of pCOLI\_G2) are designed to be linearized with the same combination of restriction enzymes (BamHI and HindIII). Proper vector linearization and subsequent purification is critical to the success of downstream cloning. Briefly, we

took 1 μg of plasmid (typically from a midi-prep (Qiagen)) and digested in a 20 μL reaction with 20 units of BamHI-HF (NEB) and 20 units of HindIII-HF (NEB) in CutSmart buffer (NEB) for 3 hrs. Each reaction was then gel purified using the Wizard SV kit (Promega) according to the manufacturer's instructions, with the exception that 30 μL of ddH<sub>2</sub>O was used for elution from the column. The final linearized plasmid product had a typical concentration of 60-100 ng/μL. To linearize pCOLI\_G2 vector the restriction enzymes BglII and XhoI were used and the plasmid was further processed as described before.

**Insert preparation.** All inserts were amplified using Q5 polymerase (NEB). PCR reactions were gel purified using Wizard SV gel and PCR cleanup. In case of amplification from a plasmid source, we paid attention to the size of the insert versus the template. In case of any potential overlap we treated our PCR reactions with 1 μL DpnI (NEB) to eliminate the donor plasmid. DpnI was then heat inactivated (15 minutes 65 C) prior to gel purification.

**Gibson cloning and verification.** Routinely we mixed 4.5 μL of purified insert with 0.5 μL of vector and added this 5 μL to one 15 μL aliquot of Gibson master mix. Our Gibson reactions were then incubated for 1 hour at 50 C, and then transformed directly into chemically competent XL1-Blue. From a large number of colonies we would typically grow two, and prep one for sequencing, keeping the other as a backup. Typically, with a well-prepared vector (see above) our cloning success rate is >95%, so we considered it wasteful to "pre-screen" with analytical digests. All agarose gels shown are 0.8% agarose, stained with GelGreen (Biotium Inc), and imaged with a ChemiDoc MP imaging system (BioRad).

**Cloning of RPA.** The RPA ORFs (Rfa1, Rfa2 and Rfa3) were amplified from *S. cerevisiae* genomic DNA (SK1



strain), using the following primers Rfa1\_Tag\_Fwd (CTGTTCCAGGGGCCCGGATCC ATGAGCAGT-GTTCAACTTTCGAGGGGCGAT), Rfa1\_rev (TCCTCTAGTACTTCTCGACAAGCTTTTATTAAGC-TAACAAAGCCTTGGATAACTCATCGGCAAG), Rfa2\_Tag\_Fwd (CTGTTCCAGGGGCCCGGATC-CATGGCAACCTATCAACCATATAACGAATATTC), Rfa2\_rev (TCCTCTAGTACTTCTCGACAAGCTTTTATCATAGGGCAAAGAAGTTATTGTTCATCAAAAAG), Rfa3\_Tag\_Fwd (CTGTTCCAGGGGCCCGGATCCATG-GCCAGCGAAACACCAAGAGTTGACCCC), Rfa3\_rev (TCCTCTAGTACTTCTCGACAAGCTTTTACTAG-TATATTTCTGGGTATTTCTTACATAG). Rfa1 was cloned into pCOLI\_A\_Strep, Rfa2 into pCOLI\_K\_His and Rfa3 into pCOLI\_S\_His. For the multicistronic assembly the Rfa1 RBS/ORF was amplified using the Alpha\_Fwd and CasI\_rev primers; Rfa2 with the CasII\_fwd and CasII\_rev primers and Rfa3 with CasIII\_fwd and Omega\_rev primers (Supplementary Table 2). The PCR amplified RBS/ORFs for each of the three RPA subunits were then assembled into linearized pCOLI\_G2, with a 3-5 fold molar excess over the plasmid backbone, as previously described for pBIG assembly 5,6. Gibson reactions were transformed directly into chemically competent XL1-blue *E. coli*, and selected on gentamycin LB agar plates. Minipreps of eight positive colonies were prepared, and subject to SmaI digest to release the individual RBS/ORF cassettes. Digests were then subject to agarose gel electrophoresis, and those clones that had bands of the appropriate molecular weight were sequence verified.

**Bacterial test expressions.** Chemically competent BL21(DE3) *E. coli* were transformed with either a combination of pCOLI\_A\_Strep\_Rfa1, pCOLI\_K\_His\_Rfa2 and pCOLI\_S\_Rfa3 (co-transformation) OR pCOLI\_G2\_RPA (multicistronic assembly). 25 mL LB shake cultures of *E. coli* were grown in the presence of all appropriate antibiotics at 37°C. As the culture reached an OD600 of 0.6 IPTG was added to a final concentration of 500 µM, for a 3 hour induction. Cells were harvested, and resuspended in lysis buffer (50 mM Na-HEPES pH 7.5, 300 mM NaCl, 10% glycerol, 1 mM MgCl<sub>2</sub>, 2 mM BME, 1 mM AEBSF, 2.5 units/mL benzonase). Resuspended cells were then broken using sonication, and the lysate cleared by ultracentrifugation. The cleared lysate was subject to affinity purification using Strep-Tactin XT resin (IBA), according to the manufacturer's instructions. The resin was subject to several washes with ice-cold lysis buffer, before elution with lysis buffer supplemented with biotin. Fractions from the expression/purification were analysed using SDS-PAGE stained with InstantBlue (Sigma). Western blotting was carried out using standard laboratory protocols, using the anti-PentaHis (Qiagen) and anti-Strep II (Abcam ab76949) as primary antibodies and HRP conjugated anti-mouse or anti-rabbit secondary antibodies (Merck).

#### ACKNOWLEDGEMENTS

We thank the members of the Weir Lab for extensive testing of the system, and for comments on the manuscript. Work in the Weir Lab is funded by the Max Planck

Society.

## Bibliography

1. Rosano, G. L. Ceccarelli, E. A. Recombinant protein expression in *Escherichia coli*: advances and challenges. *Front Microbiol* 5, 172 (2014).
2. Berrow, N. S. et al. A versatile ligation-independent cloning method suitable for high-throughput expression screening applications. *Nucleic Acids Res* 35, e45 e45 (2007).
3. Bieniossek C, Imasaki T, Takagi Y, Berger I. MultiBac: expanding the research toolbox for multiprotein complexes. *Trends Biochem Sci.* 2012;37(2):49-57.
5. Weissmann, F. et al. biGBac enables rapid gene assembly for the expression of large multisubunit protein complexes. *Proc National Acad Sci* 113, E2564 9 (2016).
6. Weissmann, F. Peters, J.-M. Expressing Multi-subunit Complexes Using biGBac. *Methods Mol Biology Clifton N J* 1764, 329 343 (2018).
7. Tan, S., Kern, R. C. Selleck, W. The pST44 polycistronic expression system for producing protein complexes in *Escherichia coli*. *Protein Expres Purif* 40, 385 395 (2005).
8. Raran-Kurussi, S., Tzs J., Cherry, S., Tropea, J. E. Waugh, D. S. Differential temperature dependence of tobacco etch virus and rhinovirus 3C proteases. *Anal Biochem* 436, 142-4 (2013).
9. Som, T. Tomizawa, J. Origin of replication of *Escherichia coli* plasmid RSF 1030. *Mol Gen Genetics Mgg* 187, 375-383 (1982).
10. Nijkamp, H. J. J. et al. The complete nucleotide sequence of the bacteriocinogenic plasmid CloDF13. *Plasmid* 16, 135-160 (1986).
11. Wold, M. S. REPLICATION PROTEIN A: A Heterotrimeric, Single-Stranded DNA-Binding Protein Required for Eukaryotic DNA Metabolism. *Annu Rev Biochem* 66, 61-92 (1997).
12. Chen, R. Wold, M. S. Replication protein A: single-stranded DNA's first responder: dynamic DNA-interactions allow replication protein A to direct single-strand DNA intermediates into different pathways for synthesis or repair. *Bioessays News Rev Mol Cell Dev Biology* 36, 1156-61 (2014).
13. Brill, S. J. Stillman, B. Replication factor-A from *Saccharomyces cerevisiae* is encoded by three essential genes coordinately expressed at S phase. *Gene Dev* 5, 1589-1600 (1991).
14. Sibenaller, Z. A., Sorensen, B. R. Wold, M. S. The 32- and 14-Kilodalton Subunits of Replication Protein A Are Responsible for Species-Specific Interactions with Single-Stranded DNA. *Biochemistry* 37, 12496-12506 (1998).

## Supplementary Table 1: InteBac Vector Suite

| Vector backbone                                                                                    | ID | Name                   | N-terminal Tag | C-term Tag | Tag Cleavage | Forward primer overhang | Reverse primer overhang |
|----------------------------------------------------------------------------------------------------|----|------------------------|----------------|------------|--------------|-------------------------|-------------------------|
| <b>pCOLI_A</b><br><b>Ampicillin resistant</b><br><b>pBR2332</b><br><b>origin of replication</b>    | 1  | pCOLI_A_NoTag          | -              | -          | -            | COLI_Fwd                | Rev                     |
|                                                                                                    | 2  | pCOLI_A_HIS            | 6xHis          | -          | 3C           | Tag_Fwd                 | Rev                     |
|                                                                                                    | 3  | pCOLI_A_C_HIS          | -              | 6 x His    | -            | Tag_Fwd                 | Tag_Rev                 |
|                                                                                                    | 4  | pCOLI_A_3c_C_HIS       | -              | His        | 3C           | COLI_Fwd                | Tag_Rev                 |
|                                                                                                    | 5  | pCOLI_A_STREP          | 2x Strep-TagII | -          | 3C           | Tag_Fwd                 | Rev                     |
|                                                                                                    | 6  | pCOLI_A_C_STREP        | -              | 2xStrepII  | -            | COLI_Fwd                | Tag_Rev                 |
|                                                                                                    | 7  | pCOLI_A_3C_C_STREP     | -              | STREP      | 3C           | COLI_Fwd                | Tag_Rev                 |
|                                                                                                    | 8  | pCOLI_A_GST            | GST            | -          | 3C           | Tag_Fwd                 | Rev                     |
|                                                                                                    | 9  | pCOLI_A_C_GST          | -              | GST        | -            | COLI_Fwd                | Tag_Rev                 |
|                                                                                                    | 10 | pCOLI_A_3C_C_GST       | -              | GST        | 3C           | COLI_Fwd                | Tag_Rev                 |
|                                                                                                    | 11 | pCOLI_A_MBP            | 6xHis-MBP      | -          | 3C           | Tag_Fwd                 | Tag_Rev                 |
|                                                                                                    | 12 | pCOLI_A_C_MBP          | -              | MBP        | -            | COLI_Fwd                | Tag_Rev                 |
|                                                                                                    | 13 | pCOLI_A_CBP            | CBP            | -          | 3C           | Tag_Fwd                 | Rev                     |
|                                                                                                    | 14 | pCOLI_A_C_CBP          | -              | CBP        | -            | COLI_Fwd                | Tag_Rev                 |
|                                                                                                    | 15 | pCOLI_A_HA             | 6xHis-3xHA     | -          | 3C           | Tag_Fwd                 | Rev                     |
|                                                                                                    | 16 | pCOLI_A_Myc            | 6xHis-6xMyc    | -          | 3C           | Tag_Fwd                 | Rev                     |
|                                                                                                    | 17 | pCOLI_A_SNAP           | 6xHis-SNAP     | -          | 3C           | Tag_Fwd                 | Rev                     |
|                                                                                                    | 18 | pCOLI_A_Trx            | 6xHis-Trx      | -          | 3C           | Tag_Fwd                 | Rev                     |
|                                                                                                    | 19 | pCOLI_A_SUMO           | 6xHis-SUMO     | -          | 3C           | Tag_Fwd                 | Rev                     |
|                                                                                                    | 20 | pCOLI_A_N-His_C_STREP  | 6xHis          | 2xStrepII  | 3C           | Tag_Fwd                 | Tag_Rev                 |
|                                                                                                    | 21 | pCOLI_A_N-GST_C_STREP  | GST            | 2xStrepII  | 3C           | Tag_Fwd                 | Tag_Rev                 |
|                                                                                                    | 22 | pCOLI_A_N-MBP_C_STREP  | 6xHis-MBP      | 2xStrepII  | 3C           | Tag_Fwd                 | Tag_Rev                 |
|                                                                                                    | 23 | pCOLI_A_N-SUMO_C_STREP | 6xHis-SUMO     | 2xStrepII  | 3C           | Tag_Fwd                 | Tag_Rev                 |
|                                                                                                    | 24 | pCOLI_A_N_STREP_C_FKBP | Strep          | FKBP       | 3C           | Tag_Fwd                 | Tag_Rev                 |
| <b>pCOLI_S</b><br><b>Spectinomycin resistant</b><br><b>CloDF13</b><br><b>origin of replication</b> | 25 | pCOLI_S_NoTag          | -              | -          | -            | COLI_Fwd                | Rev                     |
|                                                                                                    | 26 | pCOLI_S_HIS            | 6xHis          | -          | 3C           | Tag_Fwd                 | Rev                     |
|                                                                                                    | 27 | pCOLI_S_C_HIS          | -              | 6 x His    | -            | COLI_Fwd                | Tag_Rev                 |
|                                                                                                    | 28 | pCOLI_S_STREP          | Strep          | -          | C            | Tag_Fwd                 | Rev                     |
|                                                                                                    | 29 | pCOLI_S_C_STREP        | -              | 2xStrep II | -            | COLI_Fwd                | Tag_Rev                 |
|                                                                                                    | 30 | pCOLI_S_MBP            | 6xHis-MBP      | -          | 3C           | Tag_Fwd                 | Rev                     |
|                                                                                                    | 31 | pCOLI_S_SUMO           | 6xHis-SUMO     | -          | 3C           | Tag_Fwd                 | Rev                     |
|                                                                                                    | 32 | pCOLI_S_HA             | 6xHis-3xHA     | -          | 3C           | Tag_Fwd                 | Rev                     |
|                                                                                                    | 33 | pCOLI_S_Myc            | 6xHis-6xMyc    | -          | 3C           | Tag_Fwd                 | Rev                     |
| <b>pCOLI_K</b><br><b>Kanamycin resistant</b><br><b>RSF1030</b><br><b>origin of replication</b>     | 34 | pCOLI_K_His            | 6xHis          | -          | 3C           | Tag_Fwd                 | Rev                     |
|                                                                                                    | 35 | pCOLI_K_HA             | 6xHis-3xHA     | -          | 3C           | Tag_Fwd                 | Rev                     |
|                                                                                                    | 36 | pCOLI_K_Myc            | 6xHis-6xMyc    | -          | 3C           | Tag_Fwd                 | Rev                     |
|                                                                                                    | 37 | pCOLI_K_STREP          | Twin Strep II  | -          | 3C           | Tag_Fwd                 | Rev                     |
|                                                                                                    | 38 | pCOLI_K_C_STREP        | -              | Strep      | -            | COLI_Fwd                | Tag_Rev                 |
|                                                                                                    | 39 | pCOLI_K_SUMO           | SUMO           | -          | -            | Tag_Fwd                 | Rev                     |
|                                                                                                    | 40 | pCOLI_K_MBP            | 6xHis-MBP      | -          | 3C           | Tag_Fwd                 | Rev                     |
|                                                                                                    | 41 | pCOLI_K                | -              | -          | -            | COLI_Fwd                | Tag_Rev                 |
|                                                                                                    | 42 | pRSF_A_C_HIS           | -              | 6 x His    | -            | COLI_Fwd                | Tag_Rev                 |

Supplementary table 1 (cont.)

| Vector backbone                                                                  | ID                  | Name            | N-term Tag | C-term Tag | Tag Cleavage | Forward primer overhang | Reverse primer overhang |
|----------------------------------------------------------------------------------|---------------------|-----------------|------------|------------|--------------|-------------------------|-------------------------|
| pLIB<br>Insect cell<br>expression<br><br>Amp resistant<br>Polyhydrin<br>promotor | 43                  | pLIB            | -          | -          | -            | pLIB_fwd                | Rev                     |
|                                                                                  | 44                  | pLIB_12HIS      | 12xHis     | -          | 3C           | Tag_Fwd                 | Rev                     |
|                                                                                  | 45                  | pLIB_C_12HIS    | -          | 12xHis     | -            | pLIB_fwd                | Tag_Rev                 |
|                                                                                  | 46                  | pLIB_3C_C_HIS   | -          | His        | 3C           | pLIB_fwd                | Tag_Rev                 |
|                                                                                  | 47                  | pLIB_GST        | GST        | -          | 3C           | Tag_Fwd                 | Rev                     |
|                                                                                  | 48                  | pLIB_C_GST      | -          | GST        | -            | pLIB_fwd                | Tag_Rev                 |
|                                                                                  | 49                  | pLIB_3C_C_GST   | -          | GST        | 3C           | pLIB_fwd                | Tag_Rev                 |
|                                                                                  | 50                  | pLIB_STREP      | 2x StrepII | -          | 3C           | Tag_Fwd                 | Rev                     |
|                                                                                  | 51                  | pLIB_C_Strep    | -          | 2xStrepII  | -            | pLIB_fwd                | Tag_Rev                 |
|                                                                                  | 52                  | pLIB_3C_C_STREP | -          | 2xStrepII  | 3C           | pLIB_fwd                | Tag_Rev                 |
|                                                                                  | 53                  | pLIB_MBP        | 6xHis-MBP  | -          | 3C           | Tag_Fwd                 | Rev                     |
|                                                                                  | 54                  | pLIB_3C_C_MBP   | -          | MBP        | 3C           | pLIB_fwd                | Tag_Rev                 |
|                                                                                  | 55                  | pLIB_C_MBP      | -          | MBP        | -            | pLIB_fwd                | Tag_Rev                 |
|                                                                                  | 56                  | pLIB_CBP        | CBP        | -          | -            | pLIB_fwd                | Rev                     |
|                                                                                  | 57                  | pLIB_C_CBP      | -          | CBP        | -            | pLIB_fwd                | Tag_Rev                 |
|                                                                                  | 58                  | pLIB_SNAP       | His-SNAP   | -          | 3C           | Tag_Fwd                 | Rev                     |
|                                                                                  | 59                  | pLIB_HIS_HA     | His-HA     | -          | -            | pLIB_fwd                | Rev                     |
| 60                                                                               | pLIB_HIS_MYC        | His_Myc         | -          | -          | pLIB_fwd     | Rev                     |                         |
| 61                                                                               | pLIB_N-Strep_C_FKBP | Strep           | FKBP       | 3C         | Tag_Fwd      | Tag_Rev                 |                         |
| 62                                                                               | pLIB_N-MBP_C_FKBP   | MBP             | FKBP       | 3C         | Tag_Fwd      | Tag_Rev                 |                         |
| 63                                                                               | pLIB_N-SUMO_C-FKBP  | SUMO            | FKBP       | 3C         | Tag_Fwd      | Tag_Rev                 |                         |
| pCOLI_G2<br>Gentamycin<br>resistant                                              | 64                  | pCOLI_G2        | -          | -          | -            | -                       | -                       |

Supplementary Table 2: Primers for Multicistronic cloning into pCOLI\_G2

| Primer name | Sequence (5'→3')                                                |
|-------------|-----------------------------------------------------------------|
| Alpha_Fwd   | CCACAACGGTTTCCCTCTAGAAGGCCTACCGGAAATAATTTTGTTTAACTTTAAGAAGG     |
| 1_rev       | AAACGTGCAATAGTATCCAGTTTATTTAAATGTTGTACATCCTCTAGTACTTCTCGACAAGC  |
| 2_Fwd       | AAACTGGATACTATTGCACGTTTAAATCCGGAAATAATTTTGTTTAACTTTAAGAAGG      |
| 2_rev       | AAACATCAGGCATCATTAGGTTTATTTAAATGTTGTACATCCTCTAGTACTTCTCGACAAGC  |
| 3_fwd       | AAACCTAATGATGCCTGATGTTTAAATCCGGAAATAATTTTGTTTAACTTTAAGAAGG      |
| 3_rev       | AAACTAAGCTATGTGAACCGTTTATTTAAATGTTGTACATCCTCTAGTACTTCTCGACAAGC  |
| 4_fwd       | AAACGGTTCACATAGCTTAGTTTAAATCCGGAAATAATTTTGTTTAACTTTAAGAAGG      |
| 4_rev       | AAACCAAGTCAATGTCTAGTGTTTATTTAAATGTTGTACATCCTCTAGTACTTCTCGACAAGC |
| 5_fwd       | AAACGGTTCACATAGCTTAGTTTAAATCCGGAAATAATTTTGTTTAACTTTAAGAAGG      |
| Omega_rev   | CGGGCTTTGTAGCAGCCGGATCTCGTTGTACATCCTCTAGTACTTCTCGACAAGC         |
